# Supplementary material for: A GREB1-steroid receptor feedforward mechanism governs differential GREB1 action in endometrial function and endometriosis
Source: PubMed Central journal article supplement (PMC10908778; doi:10.1038/s41467-024-46180-4), 2024-03-02
Supplement: 41467_2024_46180_MOESM1_ESM.pdf [file 41467_2024_46180_MOESM1_ESM.pdf]

1 **Supplementary Materials for**

2 **A GREB1-steroid receptor feedforward mechanism governs differential GREB1 action in**  
3 **endometrial function and endometriosis**

4 Sangappa B. Chadchan<sup>1</sup>, Pooja Popli<sup>1</sup>, Zian Liao<sup>1</sup>, Eryk Andreas<sup>2</sup>, Michelle Dias<sup>3</sup>, Tianyuan  
5 Wang<sup>4</sup>, Stephanie J. Gunderson<sup>2</sup>, Patricia T. Jimenez<sup>2</sup>, Denise G. Lanza<sup>5</sup>, Rainer B. Lanz<sup>6</sup>,  
6 Charles E. Foulds<sup>7</sup>, Diana Monsiavais<sup>1</sup>, Francesco J. DeMayo<sup>8</sup>, Hari Krishna Yalamanchili<sup>3,9,10</sup>,  
7 Emily S. Jungheim<sup>2,11</sup>, Jason D. Heaney<sup>5</sup>, John P. Lydon<sup>6</sup>, Kelle H. Moley<sup>2</sup>, Bert W. O'Malley<sup>6</sup>,  
8 and Ramakrishna Kommagani<sup>1,12\*</sup>

9 **The PDF file includes:**

10 Supplementary Fig. 1 GREB1 acts as a PR cofactor in human endometrial stromal cells.

11 Supplementary Fig. 2 *Greb1* KO mice have normal ovarian function.

12 Supplementary Fig. 3 Compromised progesterone signaling in the uteri of *Greb1* KO mice.

13 Supplementary Fig. 4 Transcript levels of *Igf1*, *Mcm2*, *Klf4*, and *Klf15* in uteri of mimicked  
14 hormonal states of pregnancy.

15 Supplementary Fig. 5 Decidualization is defective in *Greb1* KO mice.

16 Supplementary Fig. 6 Estradiol (E2) levels are unaltered in serum collected from control or *Greb1*  
17 endometriotic females.

18 Supplementary Table 1 List of primers and TaqMan probes

19 Supplementary Table 2 List of antibodies

20 Supplementary Table 3 List of Primers used for Chromatin Immunoprecipitation (ChIP).

21 **Supplementary figure legends**

22 **Supplementary Fig. 1 GREB1 acts as a PR cofactor in human endometrial stromal cells. a,**

23 Visualization of GREB1 and PR ChIP-seq peaks enriched around the enhancer region of FOXO1.

24 **b,** Gene ontology of enriched signaling pathways from GREB1 HES cistrome.

**a**

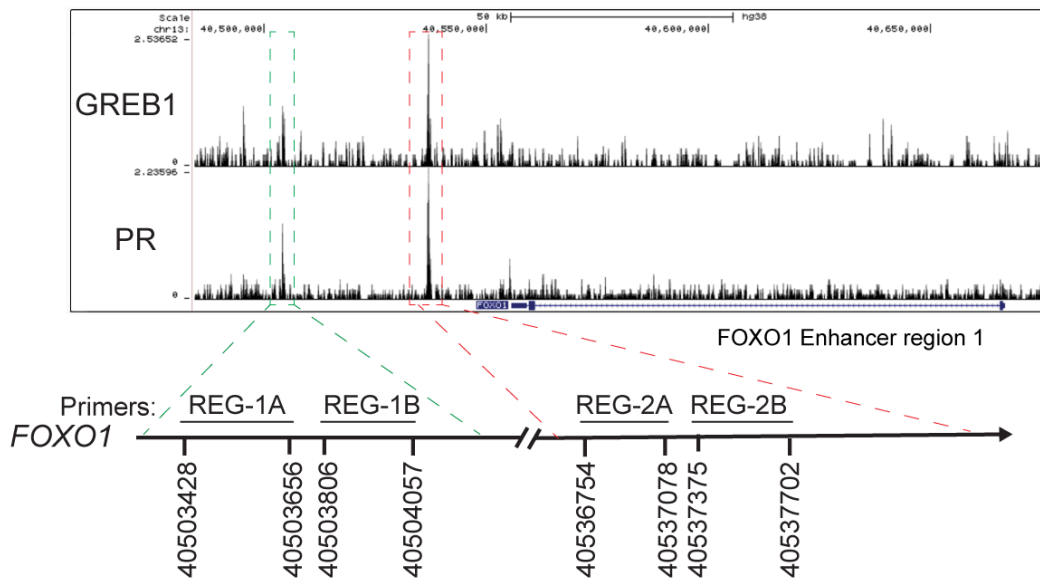

**b**

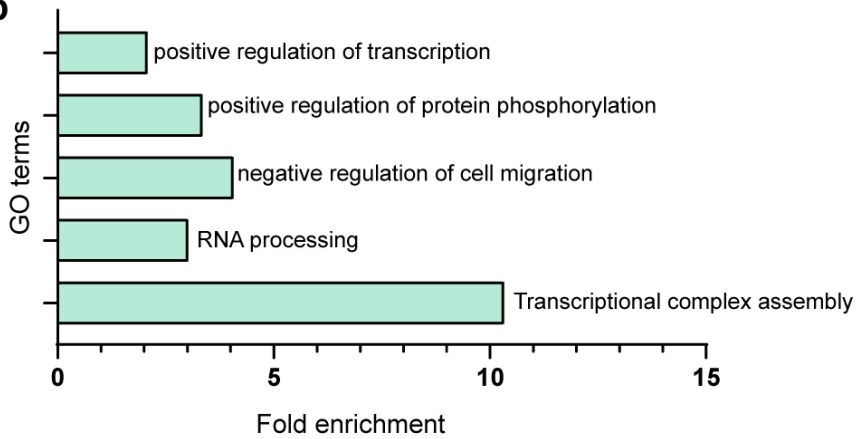

25

26

27

28

29 **Supplementary Fig. 2 *Greb1* KO mice have normal ovarian function.** **a**, Graph depicting the  
 30 number of litter per female from wild type (n=9) and *Greb1* KO (n=8) in six-month fertility tests.  
 31 Paired, two-tailed, t-test. Data reported as the mean  $\pm$  SEM. \*P< 0.05, \*\*\*P< 0.001, \*\*\*\*P< 0.0001  
 32 **b**, Analysis of GREB1 transcript and protein levels in ovaries from wild-type (WT) (n=6) and *Greb1*  
 33 KO mice (n=6). Paired, two-tailed, t-test. Data reported as the mean  $\pm$  SEM. \*P< 0.05, \*\*\*P<  
 34 0.001, \*\*\*\*P< 0.0001. Red arrowhead indicates the GREB1-positive cells and black arrowhead  
 35 indicates GREB1-negative cells; scale bar: 200  $\mu$ m. **c**, The relative mRNA concentration of *Esr1*  
 36 and *Pgr* (determined by QRT-PCR) in the ovary of WT (n=6) and *Greb1* KO mice (n=6). Paired,  
 37 two-tailed, t-test. Data reported as the mean  $\pm$  SEM. \*P< 0.05, \*\*\*P< 0.001, \*\*\*\*P< 0.0001. **d**,  
 38 Representative cross-sectional images of the ovary from WT and *Greb1* KO mice stained for ER-  
 39 alpha and PR; scale bar: 200  $\mu$ m. At the time of tissue collection, most of the females from WT or  
 40 *Greb1* KO were at the diestrus or metestrus stage of the estrous cycle.

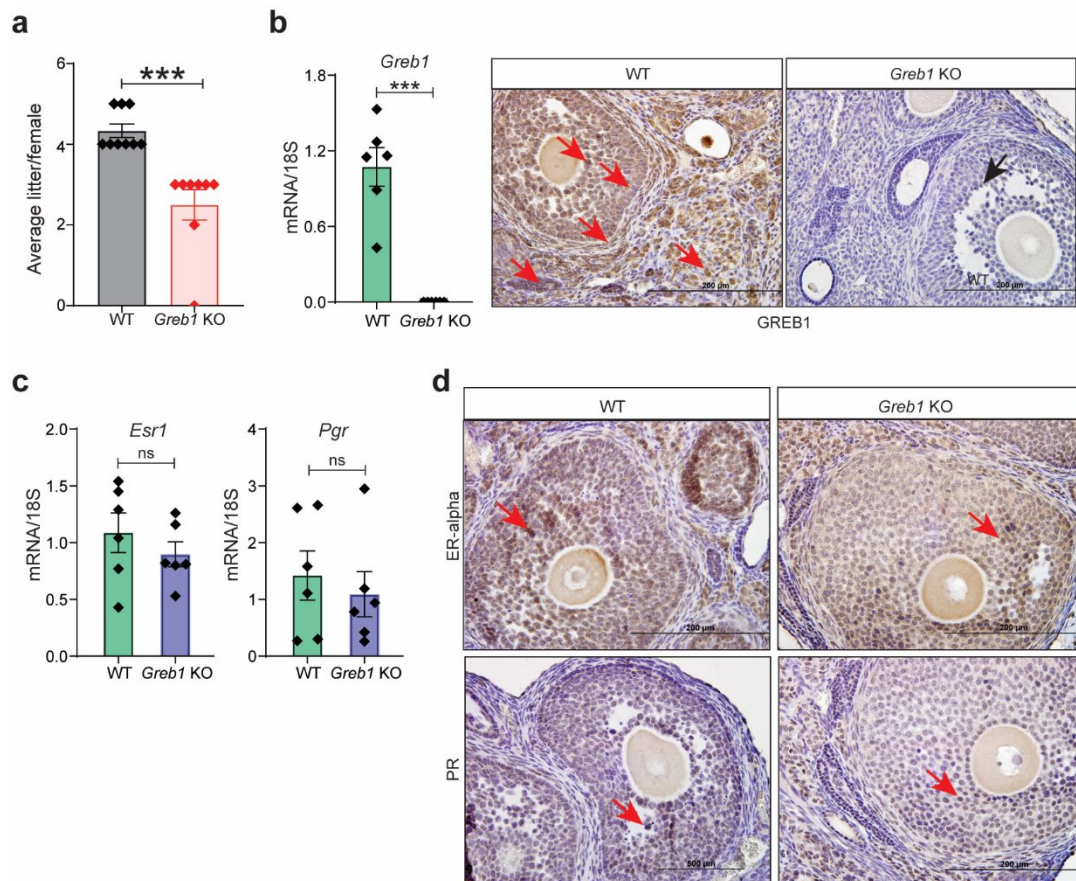

42 **Supplementary Fig. 3 Compromised progesterone signaling in the uteri of *Greb1* KO mice.**

43 **a**, Relative transcript levels of *Muc1* in uterine tissues of dpc 4 from wild type (n=5) and *Greb1*

44 KO mice (n=5). Paired, two-tailed, t-test. Data reported as the mean  $\pm$  SEM. \*P< 0.05, \*\*\*P<

45 0.001, \*\*\*\*P< 0.0001. **b**, Relative mRNA levels of *Greb1*, *Pgr*, and *Esr1* in the uteri of *Greb1* KO

46 and WT mice at dpc 4 (n=5 for each genotype). Paired, two-tailed, t-test. Data reported as the

47 mean  $\pm$  SEM. \*P< 0.05, \*\*\*P< 0.001, \*\*\*\*P< 0.0001. **b**, Relative mRNA levels of progesterone

48 target genes, *Foxo1*, *Areg*, and *Hand2* in the uteri of *Greb1* KO and WT mice at dpc 4 (n=5 for

49 each genotype). Paired, two-tailed, t-test. Data reported as the mean  $\pm$  SEM. \*P< 0.05, \*\*\*P<

50 0.001, \*\*\*\*P< 0.0001.

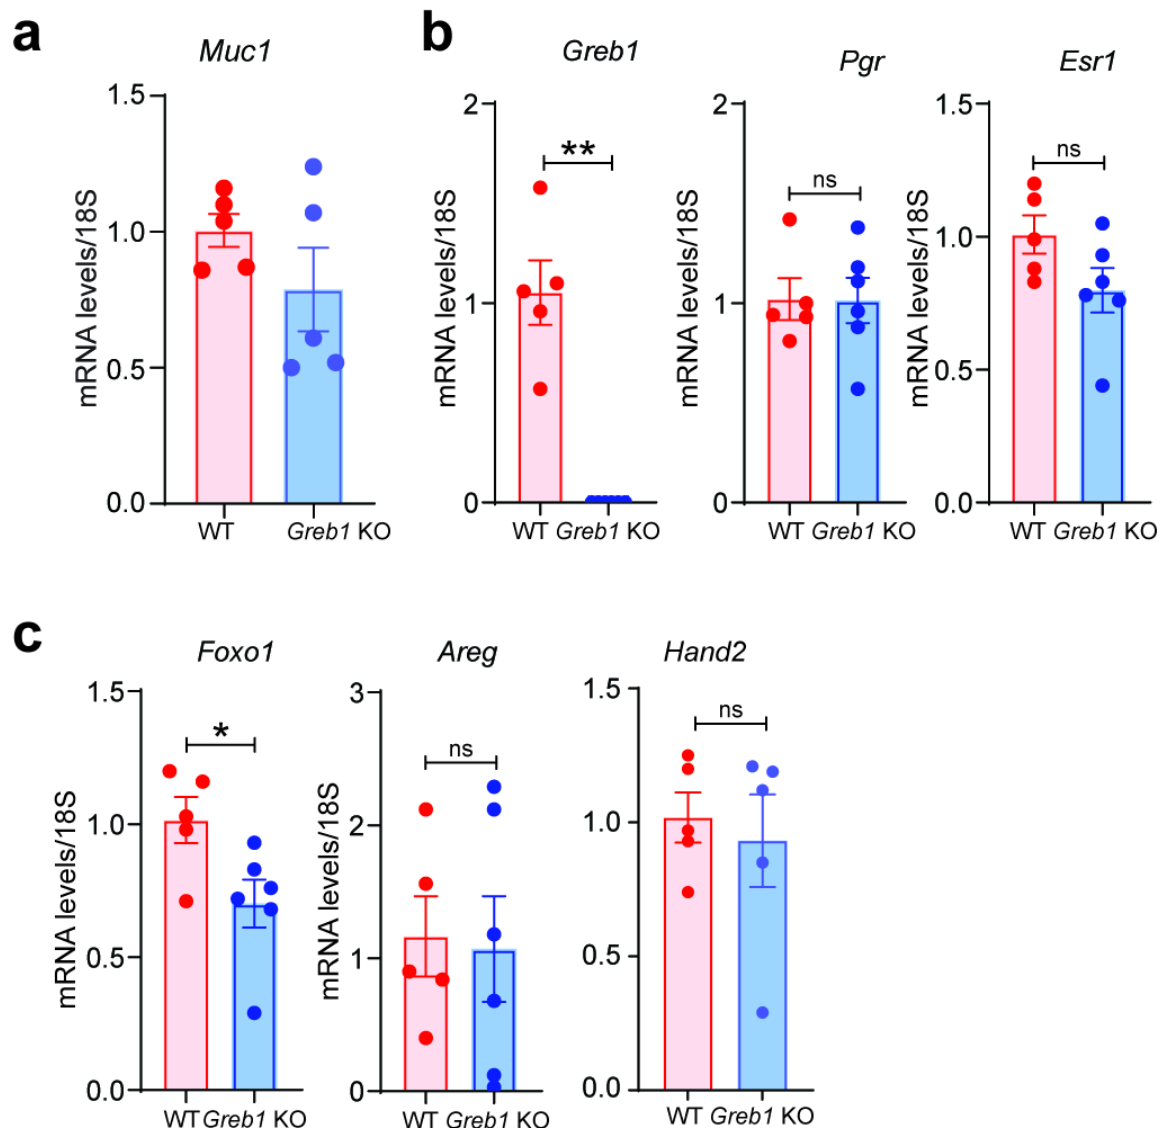

52 **Supplementary Fig. 4 Transcript levels of *Igf1*, *Mcm2*, *Klf4*, and *Klf15* in uteri of mimicked**  
 53 **hormonal states of pregnancy. a-d, Relative mRNA levels of *Igf1* a, *Mcm2* b, *Klf4* c, and *Klf15***  
 54 **d, from uteri from WT and *Greb1* KO mice in the indicated treatment groups. Data was analyzed**  
 55 **by one-way ANOVA with Tukey's multiple comparisons post-test and presented as mean  $\pm$  SEM**  
 56 **(n =4-6), P< 0.05, \*\*P<0.01, \*\*\*P< 0.001, and ns, non-significant.**

57

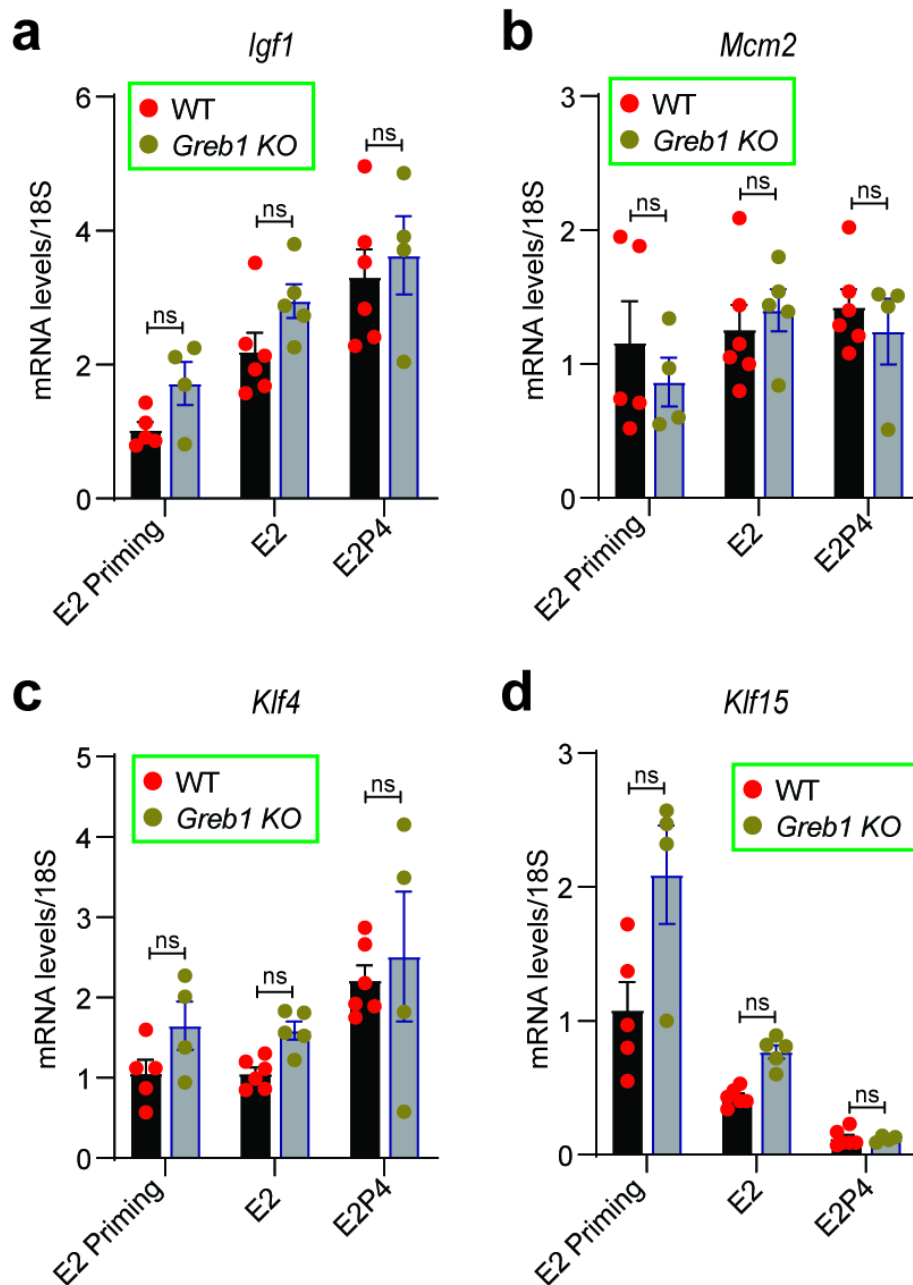

58 **Supplementary Fig. 5 Decidualization is defective in *Greb1* KO mice.** **a**, Timeline for induction  
59 of artificial decidualization in ovariectomized mice. **b**, Representative images showing the gross  
60 morphology of C: control and S: stimulated (oil-treated) uterine horns from WT and *Greb1* KO  
61 mice collected 2 days after oil injection. The ratio between the wet weight of the oil-treated horn  
62 to the wet weight of the untreated horn was calculated for each WT and *Greb1* KO (n = 5-6)  
63 mouse; then ratios were averaged and compared across genotypes by using Paired, two-tailed,  
64 t-test. Data reported as the mean  $\pm$  SEM. \*P< 0.05, \*\*\*P< 0.001, \*\*\*\*P< 0.0001. **c**, Representative  
65 cross-sectional images of the oil-treated uterus stained for Phospho-Histone H3 (PH3) from WT  
66 and *Greb1* KO mice. Red arrowhead indicates the PH3-positive cells and black arrowhead  
67 indicates PH3-negative cells; scale bar: 200  $\mu$ m. The graph on the right depicts the percentage  
68 of ESCs (Endometrial stromal cells) undergoing proliferation in the stimulated horn of the WT  
69 (n=6) and *Greb1* KO (n=5) mice two days following receipt of the decidualogenic stimulus.  
70 Percentage of PH3 positive cells was calculated by counting positive cells in four separate fields  
71 at 400X magnification in uteri by an investigator blinded to treatment groups and plotted as  
72 percent positive cells relative to total cells. Paired, two-tailed, t-test. Data reported as the mean  $\pm$   
73 SEM. \*P< 0.05, \*\*\*P< 0.001, \*\*\*\*P< 0.0001. **d**, Relative mRNA levels of decidualization marker  
74 genes (*Bmp2* and *Wnt4*) assayed by qRT-PCR. Data was analyzed by one-way ANOVA with  
75 Tukey's multiple comparisons post-test and presented as mean  $\pm$  SEM (n=4-6), P< 0.05,  
76 \*\*P<0.01, \*\*\*P< 0.001, and ns, non-significant.

77

78

79

80

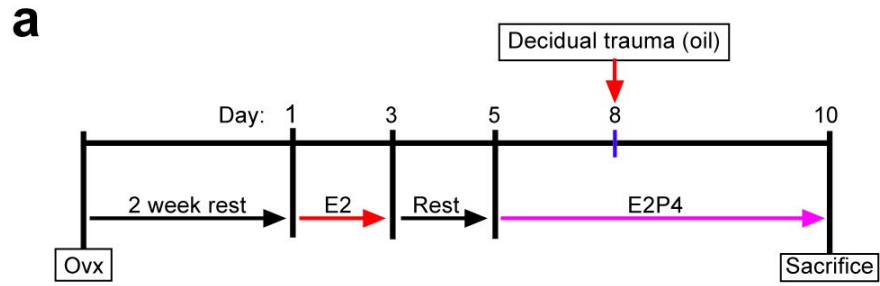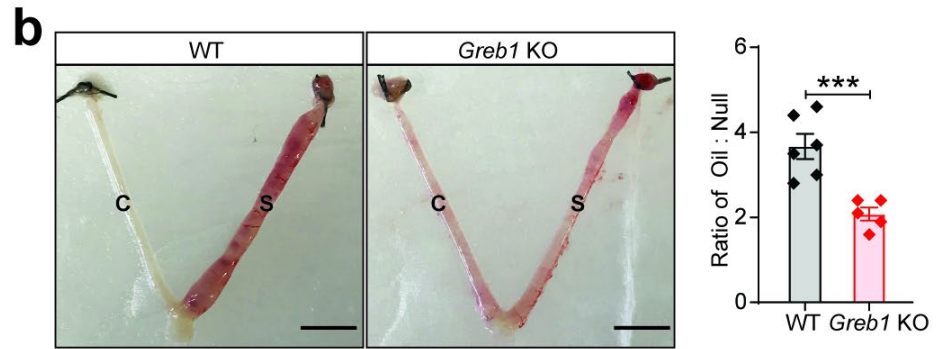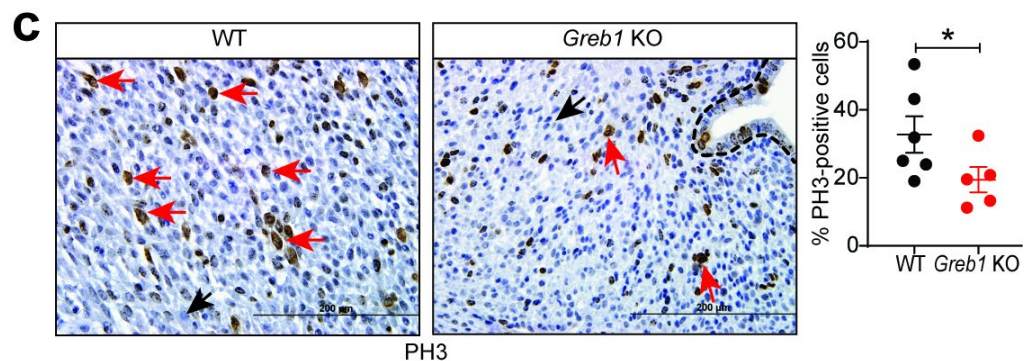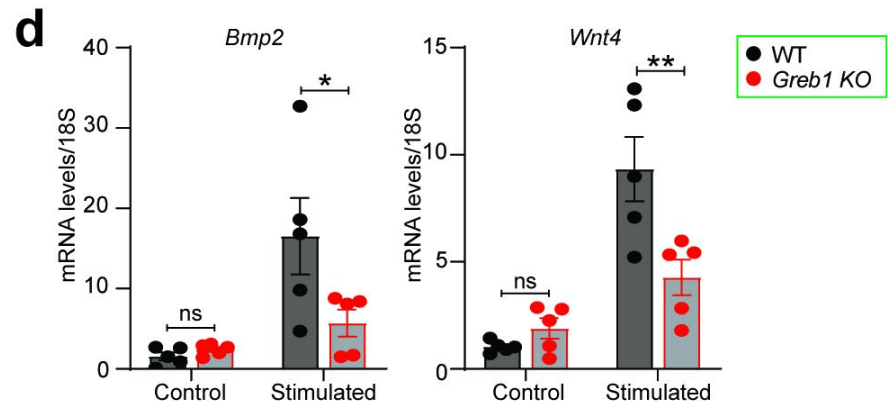

94 **Supplementary Fig. 6 Estradiol (E2) levels are unaltered in serum collected from control or**  
95 ***Greb1* endometriotic females.** Graphs depicting the level of estrogen from WT (n=5) or *Greb1*  
96 endometriotic KO (n=5) mice. Paired, two-tailed, t-test. Data reported as the mean  $\pm$  SEM. \*P<  
97 0.05, \*\*\*P< 0.001, \*\*\*\*P< 0.0001.

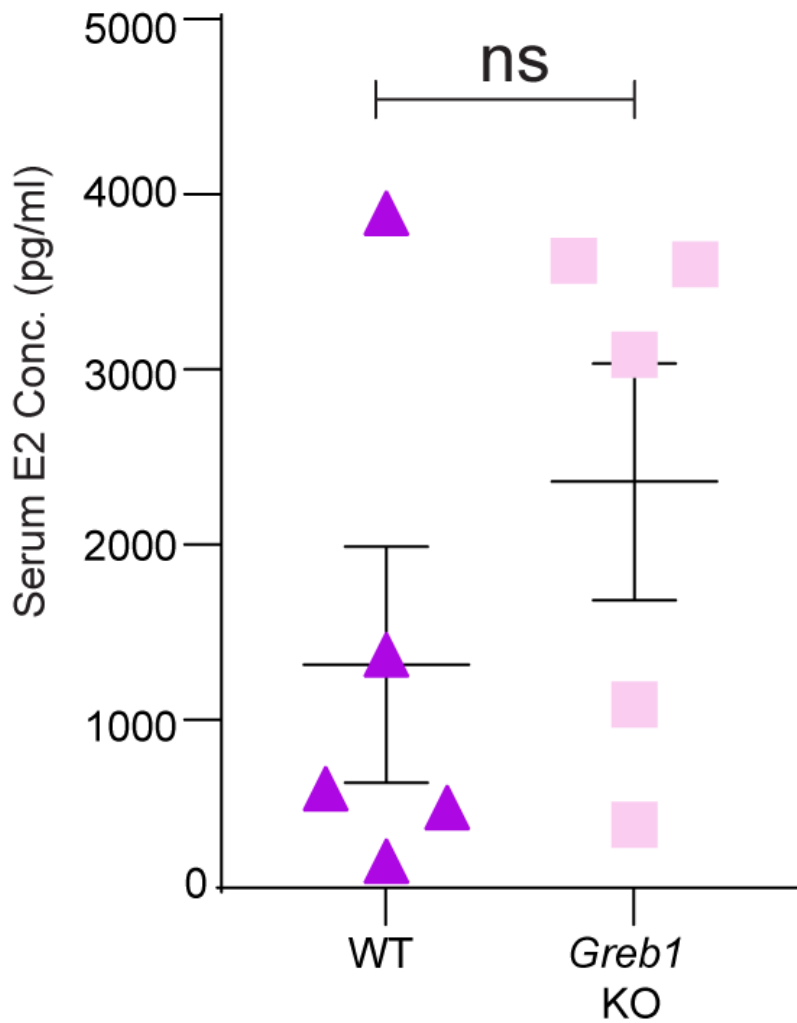



99 **Supplementary Table 1 List of primers and TaqMan probes**

| Gene name      | Species        | Application, Chemistry | Company | Sequence/Cat. No.                                                               |
|----------------|----------------|------------------------|---------|---------------------------------------------------------------------------------|
| Greb1 KO       | Mouse          | Genotyping             | IDT     | P1: GACAGGGTGTTCCTTTTGC<br>P2: TTAGGCCACCATTGGAAACT<br>P3: ACAACCTCAGGCTGCAATTT |
| <i>Greb1</i>   | Mouse          | qPCR, TaqMan           | ABI     | Mm00479259_m1                                                                   |
| <i>Esr1</i>    | Mouse          | qPCR, TaqMan           | ABI     | Mm00433149_m1                                                                   |
| <i>Pgr</i>     | Mouse          | qPCR, TaqMan           | ABI     | Mm00435628_m1                                                                   |
| <i>Fgf18</i>   | Mouse          | qPCR, TaqMan           | ABI     | Mm00433286_m1                                                                   |
| <i>Areg</i>    | Mouse          | qPCR, TaqMan           | ABI     | Mm01354339_m1                                                                   |
| <i>Bmp2</i>    | Mouse          | qPCR, TaqMan           | ABI     | Mm01340178_m1                                                                   |
| <i>Igf1</i>    | Mouse          | qPCR, TaqMan           | ABI     | Mm00439560_m1                                                                   |
| <i>Klf4</i>    | Mouse          | qPCR, TaqMan           | ABI     | Mm00516104_m1                                                                   |
| <i>Klf15</i>   | Mouse          | qPCR, TaqMan           | ABI     | Mm00517792_m1                                                                   |
| <i>Ccnd1</i>   | Mouse          | qPCR, TaqMan           | ABI     | Mm00432359_m1                                                                   |
| <i>Mcm2</i>    | Mouse          | qPCR, TaqMan           | ABI     | Mm00484804_m1                                                                   |
| <i>Wnt4</i>    | Mouse          | qPCR, TaqMan           | ABI     | Mm01194003_m1                                                                   |
| <i>Ihh</i>     | Mouse          | qPCR, TaqMan           | ABI     | Mm00439613_m1                                                                   |
| <i>Foxo1</i>   | Mouse          | qPCR, TaqMan           | ABI     | Mm00490671_m1                                                                   |
| <i>Cyp26a1</i> | Mouse          | qPCR, TaqMan           | ABI     | Mm00514486_m1                                                                   |
| <i>Il13ra2</i> | Mouse          | qPCR, TaqMan           | ABI     | Mm00515166_m1                                                                   |
| <i>Muc1</i>    | Mouse          | qPCR, TaqMan           | ABI     | Mm00449604_m1                                                                   |
| <i>Hand2</i>   | Mouse          | qPCR, TaqMan           | ABI     | Mm00439247_m1                                                                   |
| <i>GREB1</i>   | Human          | qPCR, TaqMan           | ABI     | Hs00536409_m1                                                                   |
| <i>FOXO1</i>   | Human          | qPCR, TaqMan           | ABI     | Hs00231106_m1                                                                   |
| <i>CCND1</i>   | Human          | qPCR, TaqMan           | ABI     | Hs00765553_m1                                                                   |
| <i>IGF1</i>    | Human          | qPCR, TaqMan           | ABI     | Hs01547656_m1                                                                   |
| <i>ESR1</i>    | Human          | qPCR, TaqMan           | ABI     | Hs01046816_m1                                                                   |
| <i>18S</i>     | Human<br>Mouse | qPCR, TaqMan           | ABI     | 4318839                                                                         |

100

101 \*All primer sequences are written 5' to 3'

102 ABI-applied biosystems

103 IDT-integrated DNA technologies.

104 **Supplementary Table 2 List of antibodies**

| <b>Antibody</b>             | <b>Company, Catalogue number</b>  | <b>Application and Titer</b>                                              |
|-----------------------------|-----------------------------------|---------------------------------------------------------------------------|
| GREB1                       | Abcam, ab72999                    | Immunoblotting (1:1000),<br>ChIP (3 ug)                                   |
| GREB1                       | ThermoFisher Scientific PA5-50673 | Immunohistochemistry<br>(1:100)<br>Immunofluorescence<br>(1:100)          |
| Ki-67                       | Abcam, ab15580                    | Immunohistochemistry<br>(1:100)                                           |
| ER- $\alpha$                | Abcam, ab75635                    | Immunohistochemistry<br>(1:100)                                           |
| Cyclin D1                   | CST, #55506                       | Immunohistochemistry<br>(1:100)                                           |
| Phospho-Histone H3          | Millipore Sigma, 06-570           | Immunohistochemistry<br>Immunofluorescence<br>(1:100)                     |
| MUC1                        | Abcam, ab15481                    | Immunofluorescence<br>(1:100)                                             |
| PR Antibody (F-4) AC        | SCBT, sc-166169 AC                | Immunoprecipitation (3 ug)                                                |
| normal mouse IgG-AC         | SCBT, sc-2343                     | Immunoprecipitation (3 ug)                                                |
| PR                          | SCBT, PR (H-190) sc-7208          | Immunohistochemistry<br>(1:100)<br>Immunoblotting (1:1000)<br>ChIP (3 ug) |
| Normal Rabbit IgG           | CST, #2729                        | Immunohistochemistry<br>(1:1000)<br>ChIP (3 ug)                           |
| Goat anti-Rabbit IgG (H+L)  | ThermoFisher Scientific, A32731   | Immunofluorescence<br>(1:100)                                             |
| GAPDH                       | CST, #2118S                       | Immunoblotting (1:5000)                                                   |
| Anti-rabbit IgG, HRP-linked | CST, #7074                        | Immunoblotting (1:3000)                                                   |

105

106 **Supplementary Table 3 List of Primers used for Chromatin Immunoprecipitation (ChIP)**

| <b>Primers</b>          | <b>Company</b> | <b>Sequence</b>         |
|-------------------------|----------------|-------------------------|
| FOXO1 Region 1A Forward | Sigma-Aldrich  | GGTCAACCAATGCACACAATG   |
| FOXO1 Region 1A Reverse | Sigma-Aldrich  | CGTAGGTCCCTGGATGAGTATAA |
| FOXO1 Region 1B Forward | Sigma-Aldrich  | CAATGCCGACGTCCAGAG      |
| FOXO1 Region 1B Reverse | Sigma-Aldrich  | GGGATTCCTGAGAACACTAAGC  |
| FOXO1 Region 2A Forward | Sigma-Aldrich  | GCTCCCAAGAATCATGTGTTATG |
| FOXO1 Region 2A Reverse | Sigma-Aldrich  | GTGTTTGTGAAGCAGGTTGG    |
| FOXO1 Region 2B Forward | Sigma-Aldrich  | GGAGCTGGTTCACAGAAAGT    |
| FOXO1 Region 2B Reverse | Sigma-Aldrich  | CCCATCAAAGTAATCAGGGACA  |
| UNTR Forward            | Sigma-Aldrich  | CTGTACCTGGGGTTCATTCATT  |
| UNTR Reverse            | Sigma-Aldrich  | CAGTAAGCCGTTCACTCTCACA  |

107

108 \*All primer sequences are written 5' to 3'
